# Supplementary material for: Flavonoid-Rich Orange Juice Intake and Altered Gut Microbiome in Young Adults with Depressive Symptom: A Randomized Controlled Study
Source: PubMed Central journal article supplement (PMC7353347; doi:10.3390/nu12061815), 2020-06-18
Supplement: nutrients-12-01815-s001.pdf [file nutrients-12-01815-s001.pdf]

Supplementary Table 1. Baseline characteristics of flavonoid-rich orange juice (FR) and flavonoid-low orange cordial (FL).

| Variables                         | FR (n = 20)       | FL (n = 20)       | p-value            |
|-----------------------------------|-------------------|-------------------|--------------------|
| Sex, N (%)                        |                   |                   |                    |
| Male                              | 8 (40)            | 8 (40)            | 1.000 <sup>‡</sup> |
| Female                            | 12 (60)           | 12 (60)           | 1.000 <sup>‡</sup> |
| Age, mean $\pm$ SD, year          |                   |                   |                    |
|                                   | 22.20 $\pm$ 2.608 | 21.45 $\pm$ 2.259 | 0.337 <sup>†</sup> |
| Residence type, N (%)             |                   |                   |                    |
| Living alone                      | 3 (15)            | 3 (15)            |                    |
| With roommate                     | 8 (40)            | 4 (20)            |                    |
| With parents                      | 7 (35)            | 11 (55)           | 0.486 <sup>*</sup> |
| Others                            | 2 (10)            | 2 (10)            |                    |
| Household income, N (%)           |                   |                   |                    |
| < 1,000,000 won per month         | 1 (5)             | 1 (5)             |                    |
| 1,000,000–2,999,999 won per month | 7 (35)            | 4 (20)            |                    |
| 3,000,000–4,999,999 won per month | 7 (35)            | 7 (35)            | 0.751 <sup>*</sup> |
| >5,000,000 won per month          | 5 (25)            | 8 (40)            |                    |
| Regular physical activity, N (%)  |                   |                   |                    |
| Yes                               | 13 (65)           | 7 (35)            | 0.058 <sup>‡</sup> |
| No                                | 7 (35)            | 13 (65)           |                    |
| Alcohol drinking, N (%)           |                   |                   |                    |
| None                              | 2 (10)            | 1 (5)             |                    |
| Less than once a month            | 4 (20)            | 3 (15)            |                    |
| Once a month                      | 3 (15)            | 3 (15)            | 0.966 <sup>*</sup> |
| 2–4 times a month                 | 9 (45)            | 11 (55)           |                    |
| 2–3 times a week                  | 2 (10)            | 2 (10)            |                    |
| Heavy drinking frequency, N (%)   |                   |                   |                    |
| None                              | 7 (35)            | 6 (30)            |                    |
| Less than once a month            | 2 (10)            | 3 (15)            |                    |
| Once a month                      | 8 (40)            | 9 (45)            | 0.791 <sup>*</sup> |
| Once a week                       | 1 (5)             | 2 (10)            |                    |
| Almost everyday                   | 2 (10)            | 0                 |                    |
| Smoking, N (%)                    |                   |                   |                    |
| None                              | 15 (75)           | 16 (80)           |                    |
| Past smoking (no current smoking) | 4 (20)            | 2 (10)            |                    |
| Occasionally                      | 1 (5)             | 0                 | 0.415 <sup>*</sup> |
| Always                            | 0                 | 2 (10)            |                    |
| Stress, N (%)                     |                   |                   |                    |
| Too much                          | 3 (15)            | 2 (10)            |                    |
| Pretty much                       | 13 (65)           | 10 (50)           |                    |
| Little                            | 4 (20)            | 7 (35)            | 0.587 <sup>*</sup> |
| Barely                            | 0                 | 1 (5)             |                    |

<sup>†</sup> Student t-test, <sup>‡</sup> Chi-square test, <sup>\*</sup> Fisher's exact test

Supplementary Table 2. Nutrient intakes of 24-h recall at baseline and 8 weeks after intervention.

| Variables                    | Flavonoid-rich orange juice (FR, n=20) |                    |                      | Flavonoid-low orange cordial (FL, n=20) |                    |                      | Δ group comparison* |
|------------------------------|----------------------------------------|--------------------|----------------------|-----------------------------------------|--------------------|----------------------|---------------------|
|                              | Baseline                               | After intervention | p-value <sup>†</sup> | Baseline                                | After intervention | p-value <sup>†</sup> |                     |
|                              | Mean ±SD                               |                    |                      | Mean ±SD                                |                    |                      |                     |
| Energy, kcal                 | 1699.86 ± 764.42                       | 1484.21 ± 486.81   | 0.045 <sup>†</sup>   | 1671.86 ± 487.26                        | 1604.72 ± 481.66   | 0.620 <sup>†</sup>   | 0.379               |
| Carbohydrate, g              | 216.62 ± 83.27                         | 223.19 ± 74.92     | 0.675 <sup>†</sup>   | 226.11 ± 91.71                          | 236.76 ± 80.83     | 0.627 <sup>†</sup>   | 0.879               |
| Protein, g                   | 67.79 ± 39.77                          | 49.12 ± 19.32      | 0.014 <sup>†</sup>   | 59.05 ± 20.14                           | 52.02 ± 18.70      | 0.223 <sup>†</sup>   | 0.197               |
| Fat, g                       | 61.40 ± 39.46                          | 44.84 ± 28.34      | 0.039 <sup>†</sup>   | 58.61 ± 21.57                           | 49.23 ± 20.41      | 0.181 <sup>†</sup>   | 0.480               |
| Fiber, g                     | 13.31 ± 7.11                           | 17.13 ± 5.00       | 0.030 <sup>†</sup>   | 18.16 ± 10.53                           | 13.04 ± 6.33       | 0.061 <sup>†</sup>   | 0.006               |
| Calcium, mg                  | 342.45 ± 239.52                        | 373.47 ± 169.82    | 0.204 <sup>‡</sup>   | 424.30 ± 210.12                         | 362.65 ± 234.77    | 0.357 <sup>†</sup>   | 0.246               |
| Phosphate, mg                | 867.38 ± 481.07                        | 681.52 ± 224.68    | 0.035 <sup>†</sup>   | 897.49 ± 391.43                         | 738.15 ± 254.39    | 0.099 <sup>†</sup>   | 0.831               |
| Iron, mg                     | 12.06 ± 9.45                           | 11.19 ± 5.98       | 0.433 <sup>‡</sup>   | 11.58 ± 4.95                            | 11.37 ± 4.12       | 0.885 <sup>†</sup>   | 0.798               |
| Sodium, mg                   | 2802.07 ± 866.72                       | 2180.83 ± 1161.21  | 0.008 <sup>†</sup>   | 3238.51 ± 1579.80                       | 2948.47 ± 1569.63  | 0.486 <sup>†</sup>   | 0.477               |
| Potassium, mg                | 1752.06 ± 998.85                       | 1724.14 ± 664.32   | 0.877 <sup>†</sup>   | 1880.32 ± 780.50                        | 1849.98 ± 730.84   | 0.901 <sup>†</sup>   | 0.994               |
| Vitamin A, μg RE             | 346.30 ± 204.60                        | 381.28 ± 161.95    | 0.375 <sup>†</sup>   | 571.20 ± 647.33                         | 439.43 ± 273.41    | 0.841 <sup>‡</sup>   | 0.328               |
| β-carotene, μg               | 1438.63 ± 1001.52                      | 1512.79 ± 1042.29  | 0.794 <sup>†</sup>   | 2503.34 ± 4090.43                       | 1946.34 ± 1632.73  | 0.898 <sup>‡</sup>   | 0.550               |
| Thiamin, mg                  | 1.63 ± 1.07                            | 1.54 ± 0.57        | 0.715 <sup>†</sup>   | 1.59 ± 0.88                             | 1.41 ± 0.51        | 0.378 <sup>†</sup>   | 0.755               |
| Riboflavin, mg               | 1.16 ± 0.67                            | 1.15 ± 0.55        | 0.957 <sup>†</sup>   | 1.49 ± 0.71                             | 1.06 ± 0.43        | 0.010 <sup>†</sup>   | 0.083               |
| Niacin, mg                   | 10.60 ± 6.31                           | 10.16 ± 5.16       | 0.852 <sup>‡</sup>   | 11.28 ± 4.02                            | 8.87 ± 3.26        | 0.044 <sup>†</sup>   | 0.255               |
| Pyridoxine, mg               | 1.42 ± 0.96                            | 1.17 ± 0.49        | 0.765 <sup>‡</sup>   | 1.16 ± 0.37                             | 1.20 ± 0.42        | 0.696 <sup>†</sup>   | 0.189               |
| Folate, μg                   | 295.90 ± 206.56                        | 392.77 ± 125.09    | 0.000 <sup>†</sup>   | 351.87 ± 183.67                         | 325.39 ± 159.24    | 0.512 <sup>†</sup>   | 0.046               |
| Vitamin B <sub>12</sub> , μg | 4.62 ± 4.84                            | 3.86 ± 3.46        | 0.002 <sup>‡</sup>   | 4.73 ± 3.88                             | 5.08 ± 5.44        | 0.779 <sup>†</sup>   | 0.476               |
| Vitamin C, mg                | 56.85 ± 74.51                          | 146.41 ± 19.55     | 0.002 <sup>‡</sup>   | 42.56 ± 30.29                           | 102.46 ± 30.80     | <0.0001 <sup>†</sup> | 0.133               |

<sup>†</sup>Paired t-test, <sup>‡</sup>Wilcoxon signed rank test, \*Student t-test

Supplementary Table 3. The content and mass spectrometry data of the seven identified flavonoids in flavonoid-rich orange juice (FR) and flavonoid-low orange cordial (FL).

| Aglycones        | Peak No. | Individual flavonoids                                               | MW  | Fragment ions<br>(m/z)                         | FR            | FR         |
|------------------|----------|---------------------------------------------------------------------|-----|------------------------------------------------|---------------|------------|
|                  |          |                                                                     |     |                                                | (mg/100 g DW) |            |
| Naringenin       | 4        | naringenin 7-O-rutinoside (narirutin)                               | 580 | 603, 581, 435, 419, 273                        | 28.3 ± 0.3    | 3.6 ± 0.1  |
| (m/z 273)        | 3        | naringenin 7-O-rutinoside-4'-O-glucoside (narirutin 4'-O-glucoside) | 742 | 765, 743, 581, 435, 273                        | 10.4 ± 0.1    | 1.1 ± 0.0  |
| Isosakuranetin   | 7        | isosakuranetin 7-O-rutinoside (didymin)                             | 594 | 617, 595, 449, 433, 287                        | 5.4 ± 0.3     | 1.0 ± 0.0  |
| (m/z 287)        |          |                                                                     |     |                                                |               |            |
| Hesperetin       | 6        | hesperetin 7-O-rutinoside (hesperidin)                              | 610 | 633, 611, 465, 449, 303                        | 74.2 ± 0.5    | 21.1 ± 0.6 |
| (m/z 303)        |          |                                                                     |     |                                                |               |            |
| Apigenin         | 2        | apigenin 6,8-di-C-glucoside(vicenin-2)                              | 594 | 617, 595, 577, 559, 541, 475,<br>457, 439, 409 | 34.8 ± 0.2    | 1.4 ± 0.0  |
| (m/z 271)        |          |                                                                     |     |                                                |               |            |
| Luteolin         | 1        | luteolin 6,8-di-C-glucoside(lucenin-2)                              | 610 | 633, 611, 593, 575, 557, 491,<br>473, 455, 425 | 2.3 ± 0.0     | 0.1 ± 0.0  |
| (m/z 287)        |          |                                                                     |     |                                                |               |            |
| Isorhamnetin     | 5        | isorhamnetin 3-O-rutinoside (narcissin)                             | 624 | 647, 479, 317                                  | 2.5 ± 0.3     | 0.1 ± 0.0  |
| (m/z 317)        |          |                                                                     |     |                                                |               |            |
| Total flavonoids |          |                                                                     |     |                                                | 157.9 ± 1.4   | 28.4 ± 0.7 |

All samples were analyzed in the positive ion mode ( $m/z$ ,  $[M+H]^+$ ) using UPLC-DAD-QToF/MS

Each value calculated as means ±SD of three replicates using an internal standard (galangin 20 ppm)

Supplementary Table 4. Nutritional composition of the study treatments in flavonoid-rich orange juice (FR) and flavonoid-low orange cordial (FL).

| Nutrients per 190 g<br>(1 serve) | Treatment       |         |
|----------------------------------|-----------------|---------|
|                                  | FR              | FL      |
|                                  | (% Daily Value) |         |
| Energy, kcal                     | 68              | 60      |
| Total Carbohydrate, g            | 16 (6)          | 15 (15) |
| Sugar, g                         | 14              | 15      |
| Sodium, mg                       | 0 (0)           | 25 (1)  |
| Total fat, g                     | 0 (0)           | 0 (0)   |
| Saturated fat, g                 | 0 (0)           | 0 (0)   |
| Trans fat, g                     | 0 (0)           | 0 (0)   |
| Cholesterol, mg                  | 0 (0)           | 0 (0)   |
| Protein, g                       | 0 (0)           | 0 (0)   |

Supplementary Table 5. Oligonucleotides used for quantitative real-time polymerase chain reaction assays.

| Species                   | Primer sequences     |                      | Size | Reference          |
|---------------------------|----------------------|----------------------|------|--------------------|
|                           | Forward              | Reverse              |      |                    |
| <i>Lachnospiraceae_uc</i> | AACAGAGGAGACAGGTGGTG | GCTTCCCTTTGTTTACGCCA | 228  | This study         |
| <i>Roseburia_uc</i>       | CGCAGCAAACGCAATAAGTA | ACCACTGCTCCGAAGAGAAA | 205  | This study         |
| <i>Bifidobacterium_uc</i> | TCGGGGTGAGTGTACCTTTC | AATTCCAGTCTCCCCTACCG | 184  | This study         |
| Universal primers         | CGGTGAATACGTTTCYCGG  | AAGGAGGTGATCCRGCCGCA | 172  | Suzuki et al. 2000 |

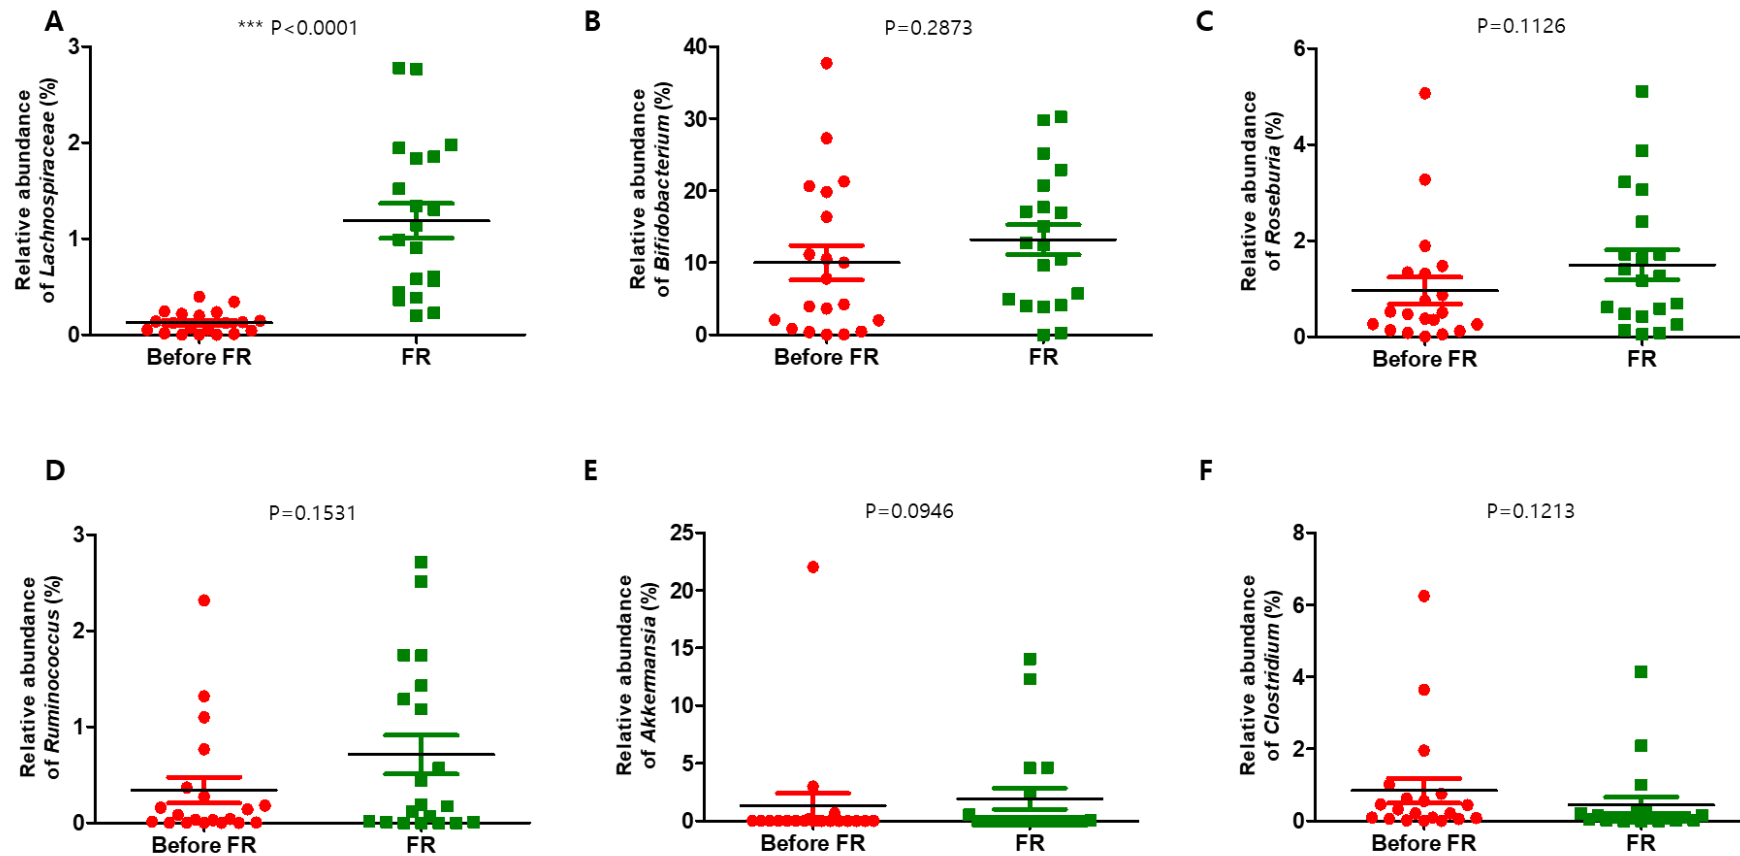

Supplement figure 1. Relative abundance of fecal microbiota between before and after flavonoid-rich FR group.

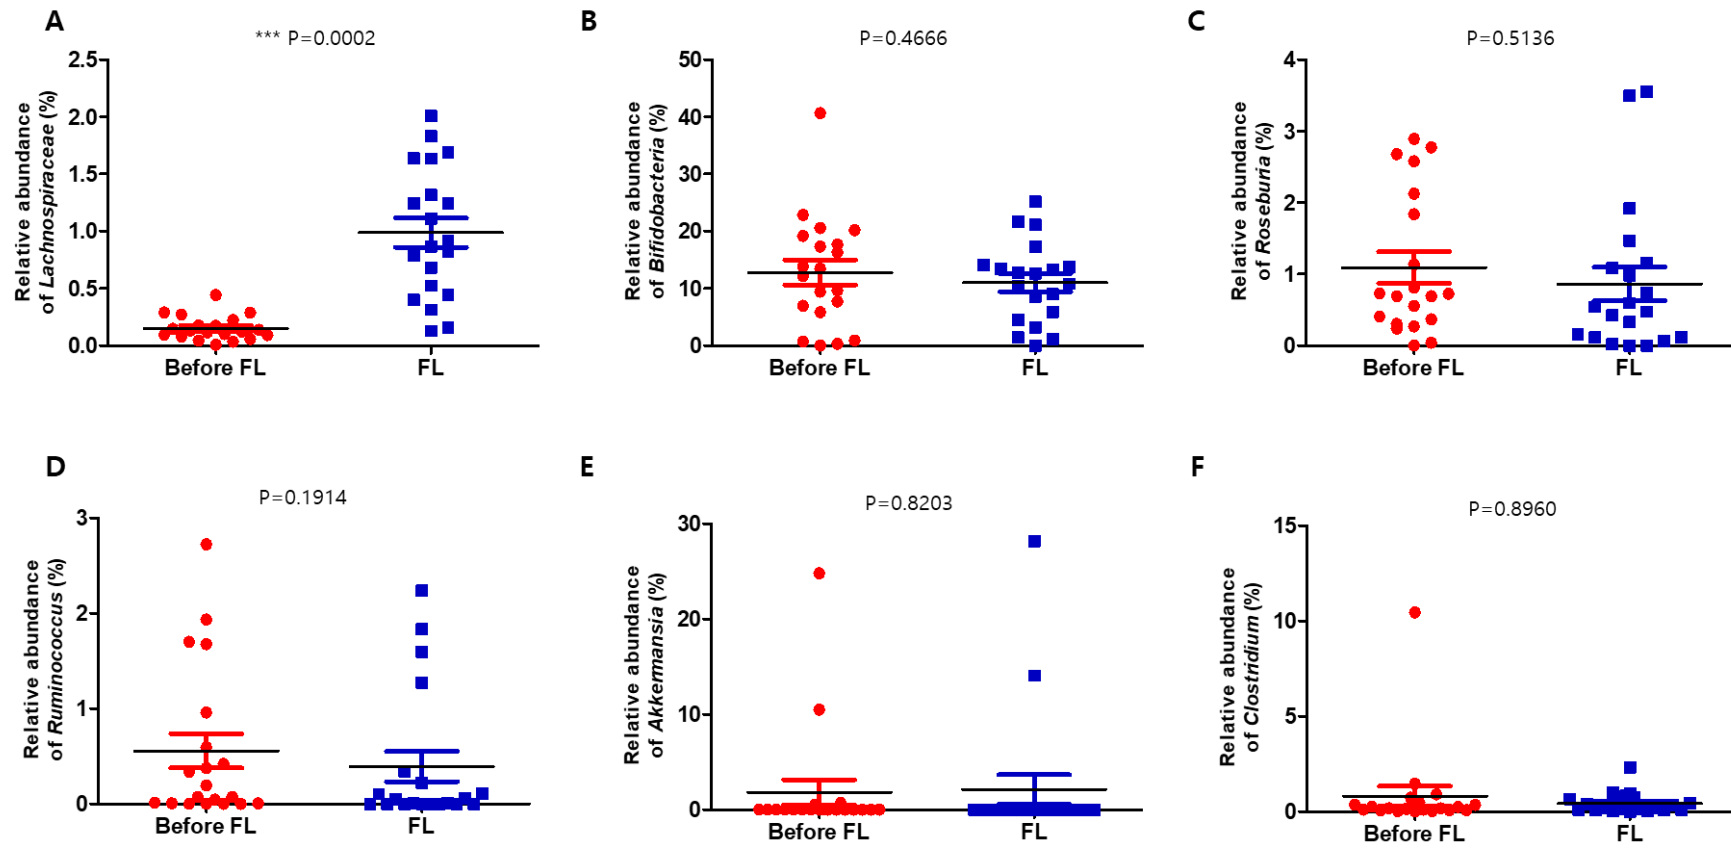

Supplement figure 2. Relative abundance of fecal microbiota between before and after flavonoid-low FL group.
